# Supplementary material for: No data instead of big data – a novel approach to stress modelling
Source: Copernicus journal article supplement (doi:10.5194/sand-2-79-2023), 2023-09-06
Supplement: Supplementary file 1 [file sand-2-79-2023-supplement.pdf]

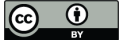

*Supplement of*

## **No data instead of big data – a novel approach to stress modelling**

**Moritz O. Ziegler et al.**

*Correspondence to:* Moritz O. Ziegler (mziegler@gfz-potsdam.de)

The copyright of individual parts of the supplement might differ from the article licence.

Moritz O. Ziegler<sup>1</sup>, Oliver Heidbach<sup>1,2</sup>, Mojtaba Rajabi<sup>3</sup>

<sup>1</sup>GFZ German Research Centre for Geosciences, Telegrafenberg, 14473 Potsdam, Germany

<sup>2</sup>Technical University Berlin, Institute for Applied Geosciences, Ernst-Reuter Platz 1, 10587 Berlin, Germany

<sup>3</sup>School of Earth and Environmental Sciences, University of Queensland, Saint Lucia, Queensland, Australia

Knowledge of undisturbed stress state in the subsurface is of key interest for safety assessment of Deep Geological Repositories. However, stress magnitude data is usually sparse, the available data subject to large uncertainties, and the acquisition of new data is expensive. This highlights the importance of 3D geomechanical-numerical models that provide the full stress tensor throughout a volume of interest. Still, such a model needs some stress magnitude data for calibration. But what happens if no such data is available?

## Define the range of all possible stress states

No pre-defined stress states by stress magnitude data is available.

Instead, all stress states that are remotely possible are regarded.

They are constrained by:

- No tensile stresses
- No excessively large stresses
- No horizontal stress rotation in an area with a stable stress orientation
- Assumptions on stress regime

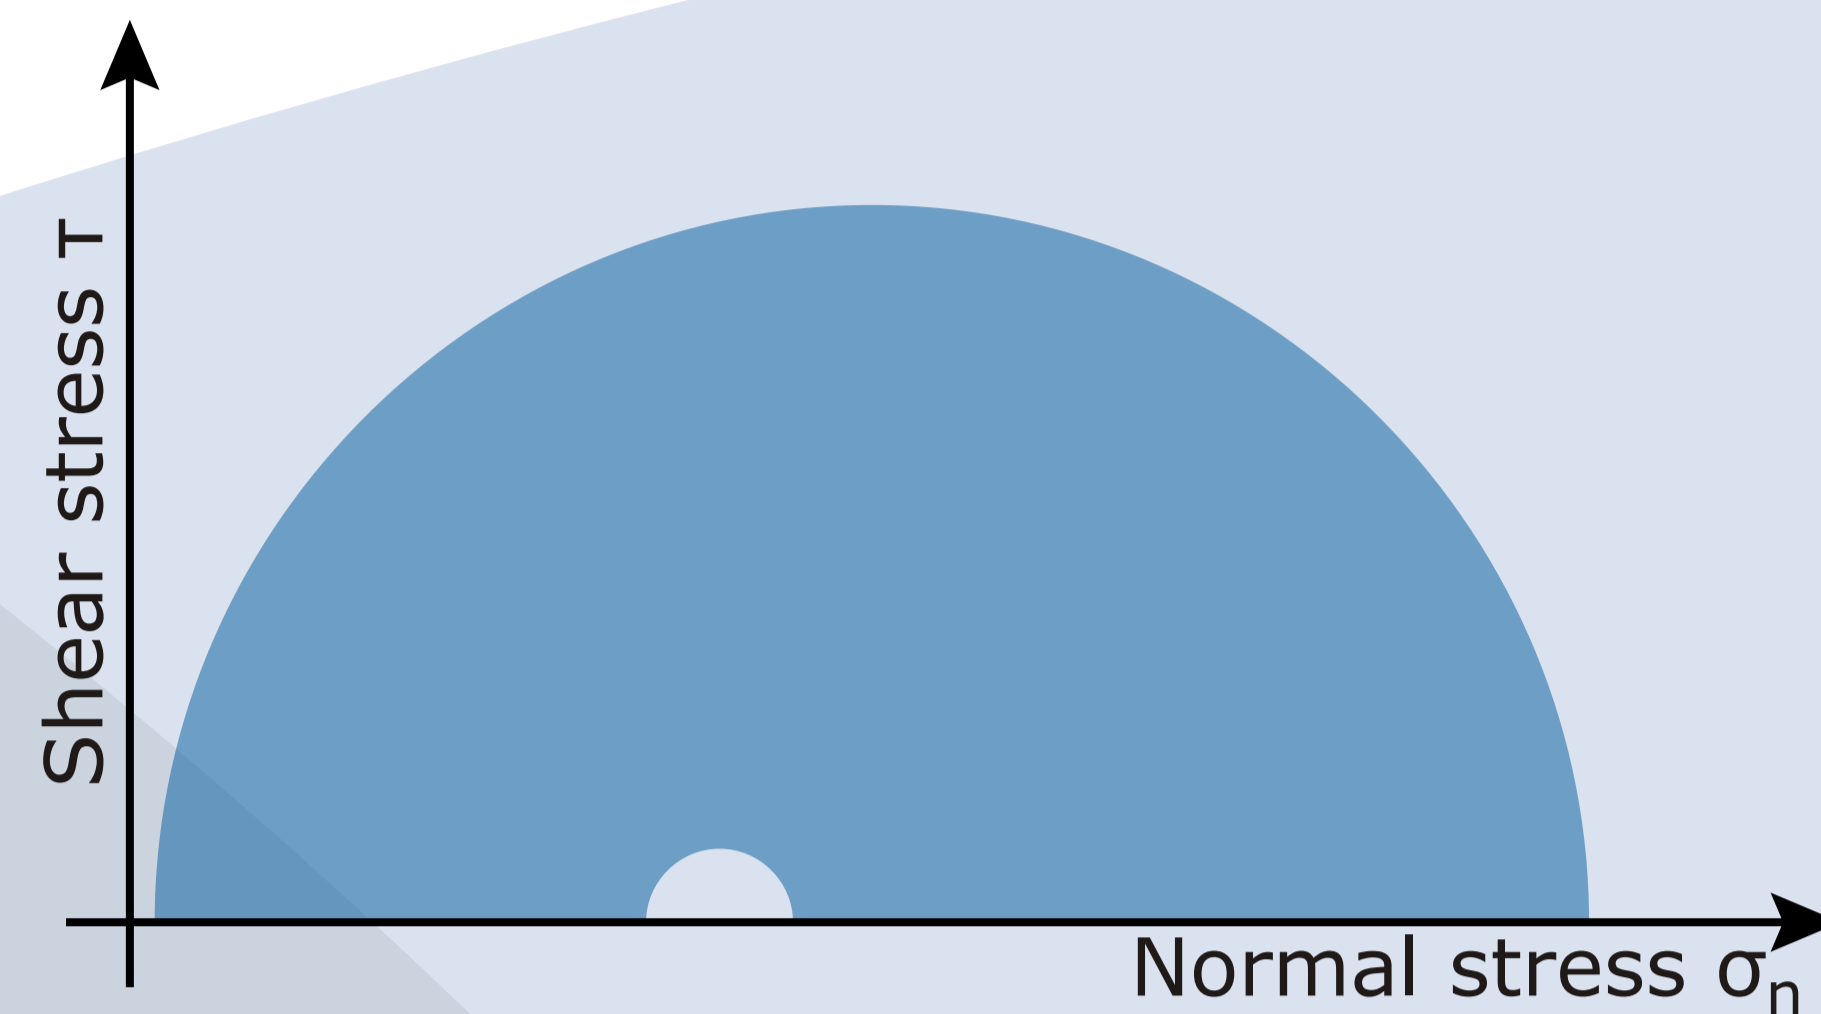

## Reduce the possible stress states to likely stress states supported by indirect data

All kinds of additional and indirect information are used to assess the plausibility of each individual possible stress state. Information can be used such as formation integrity tests, observed borehole breakouts, or observed seismicity. If indirect information is in agreement with a certain stress state, this stress state has a higher probability.

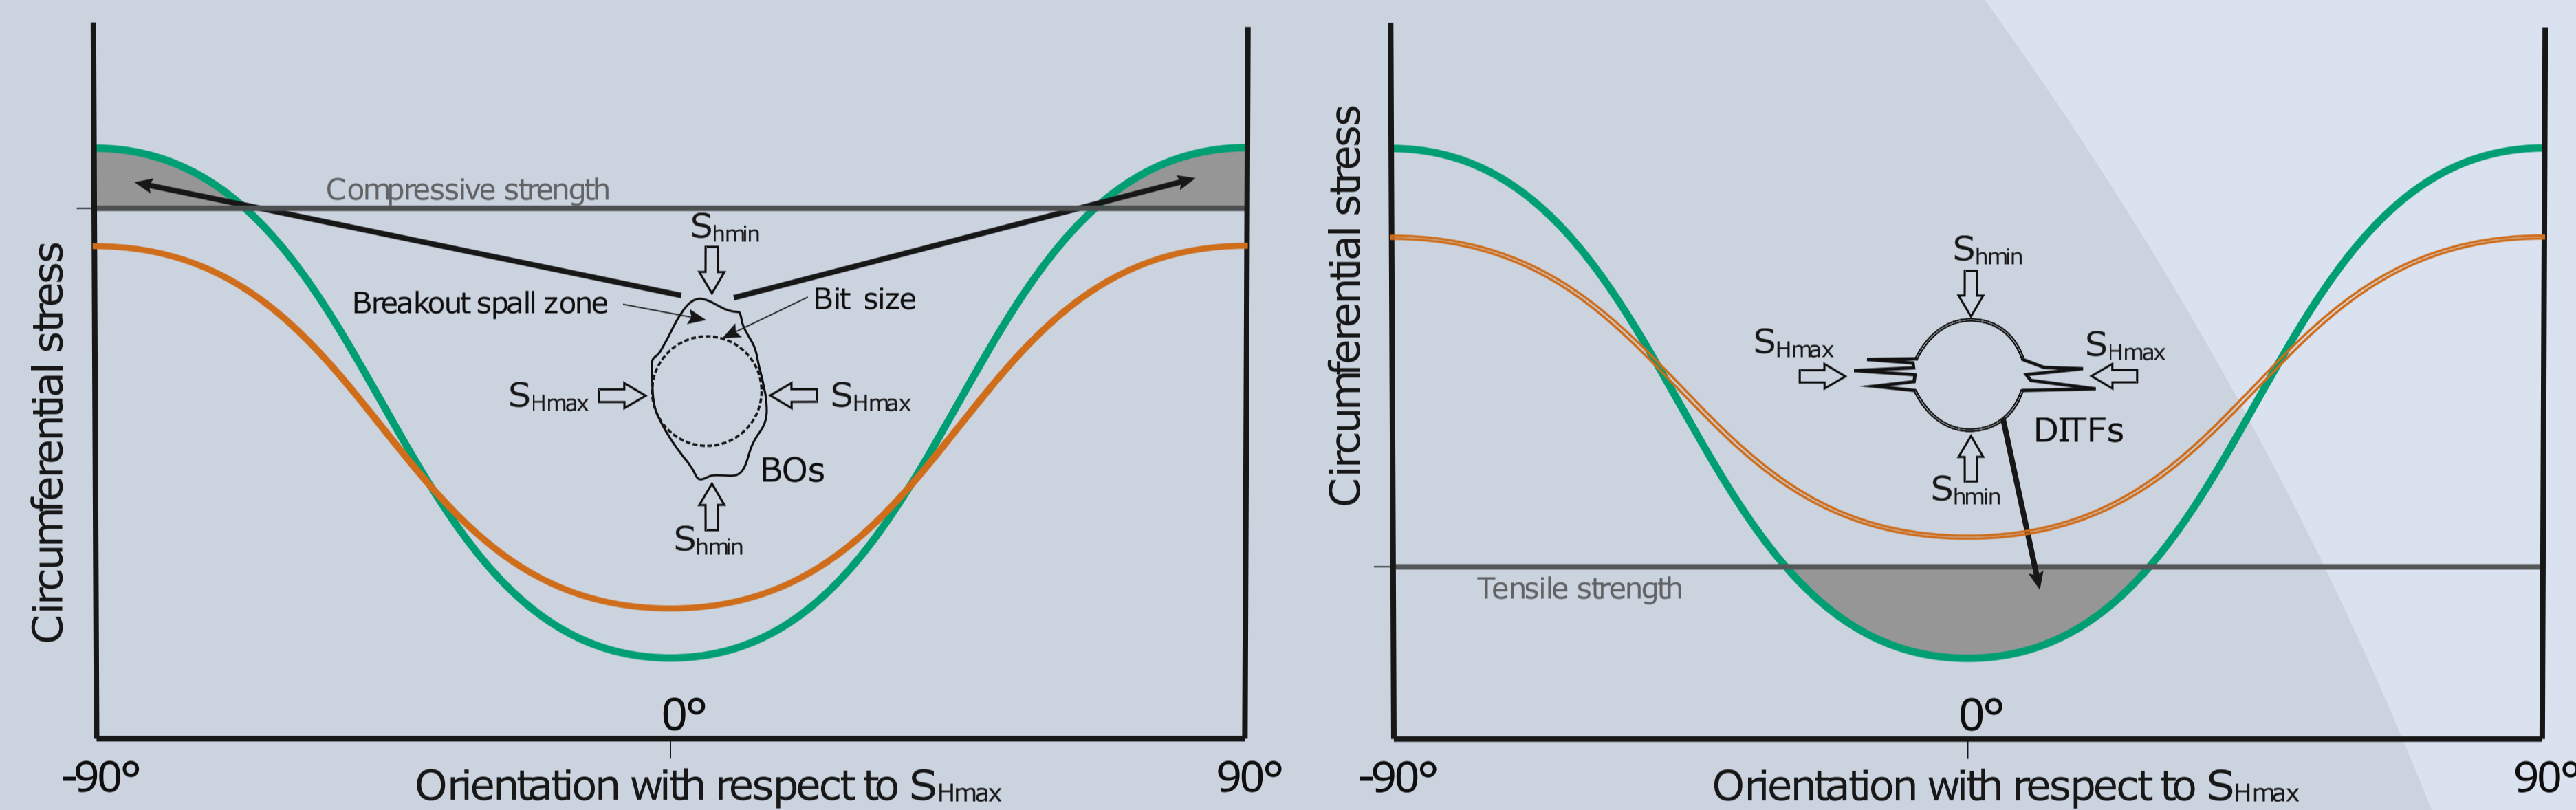

This procedure allows to assign weights to all possible stress states as well as to potentially pre-defined stress states. In both cases the predictive quality of the model is increased. In addition, the significance of the model is increased since now uncertainties in the modelled stress state are considered.

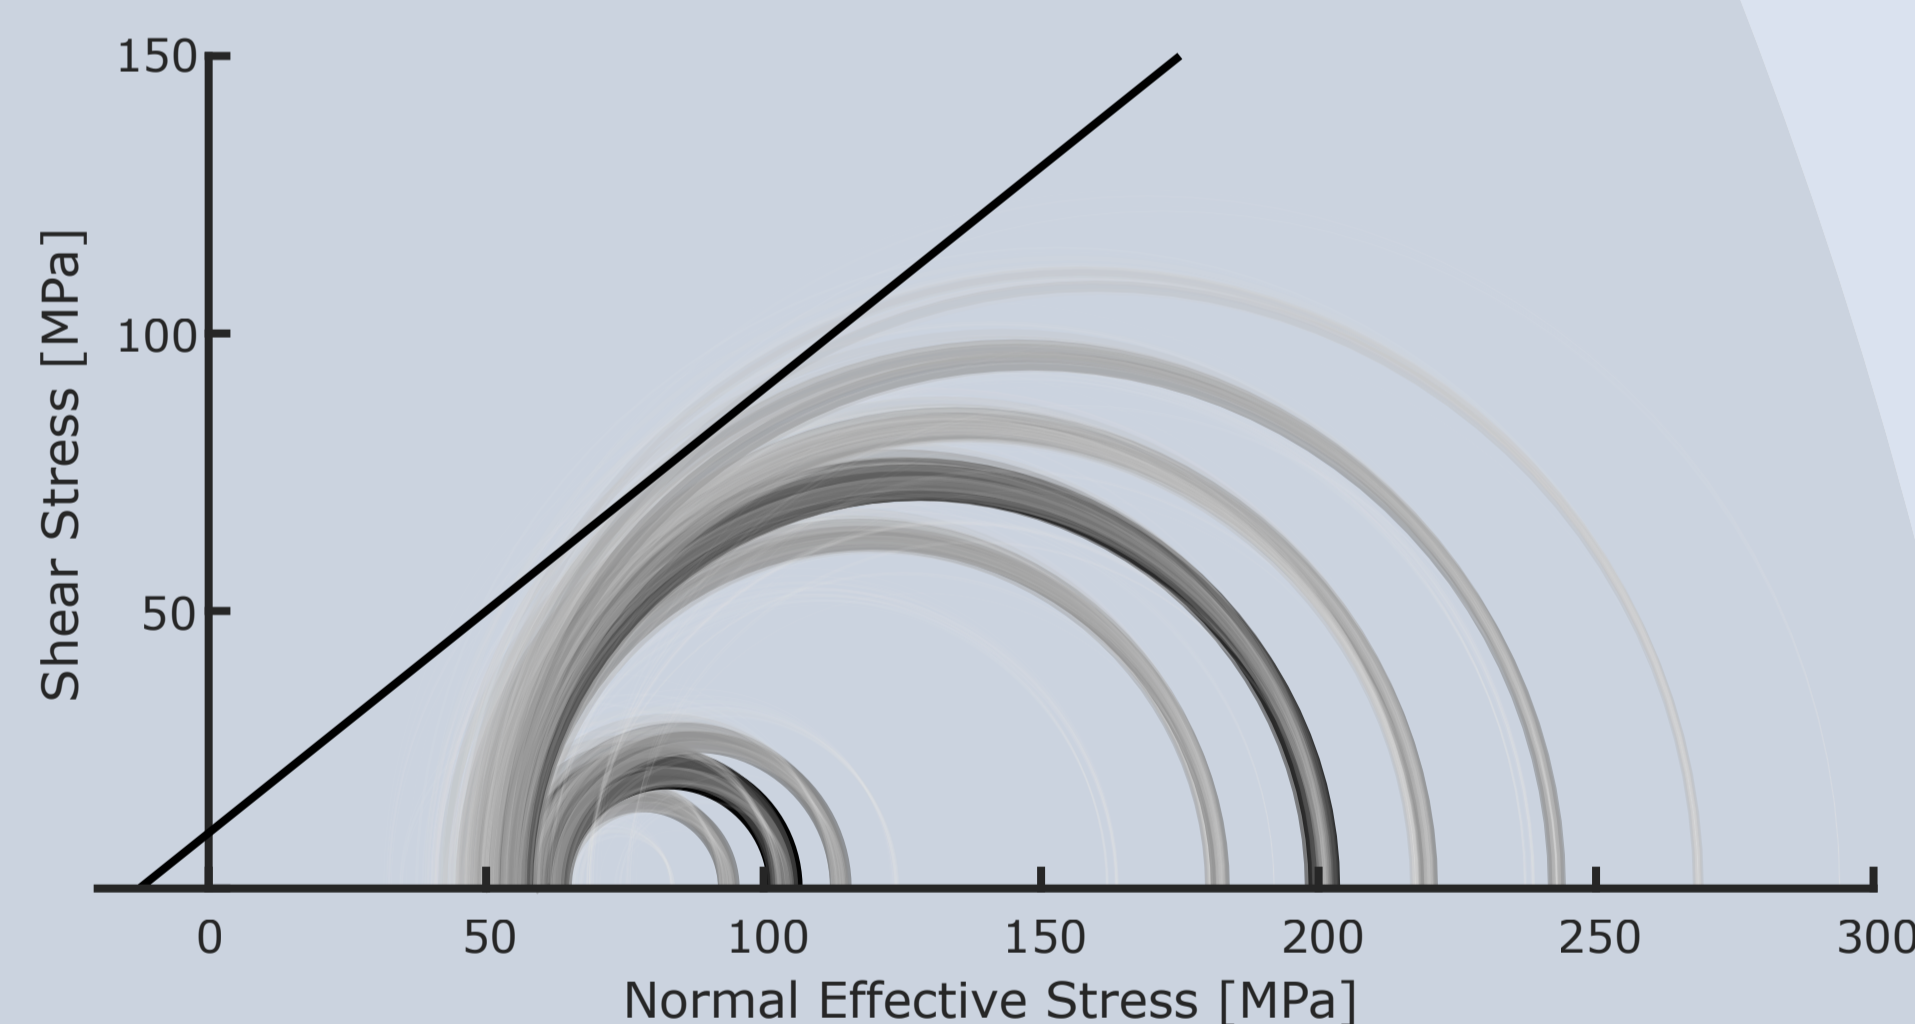

## Learn from the model

In addition to an increase in predictive quality of the modelled stress state, the model returns additional value. Regional and local anomalies or patterns in the agreement of indirect data can uncover or highlight characteristics of the modelled volume and initiate further research.

Here, this is exemplified in a model of the Bowen Basin (Queensland, Australia) where an extremely good fit to stress magnitude data is observed. However, the compressive strength required to create the observed borehole breakouts are laterally highly variable and suggest several different zones of the model.

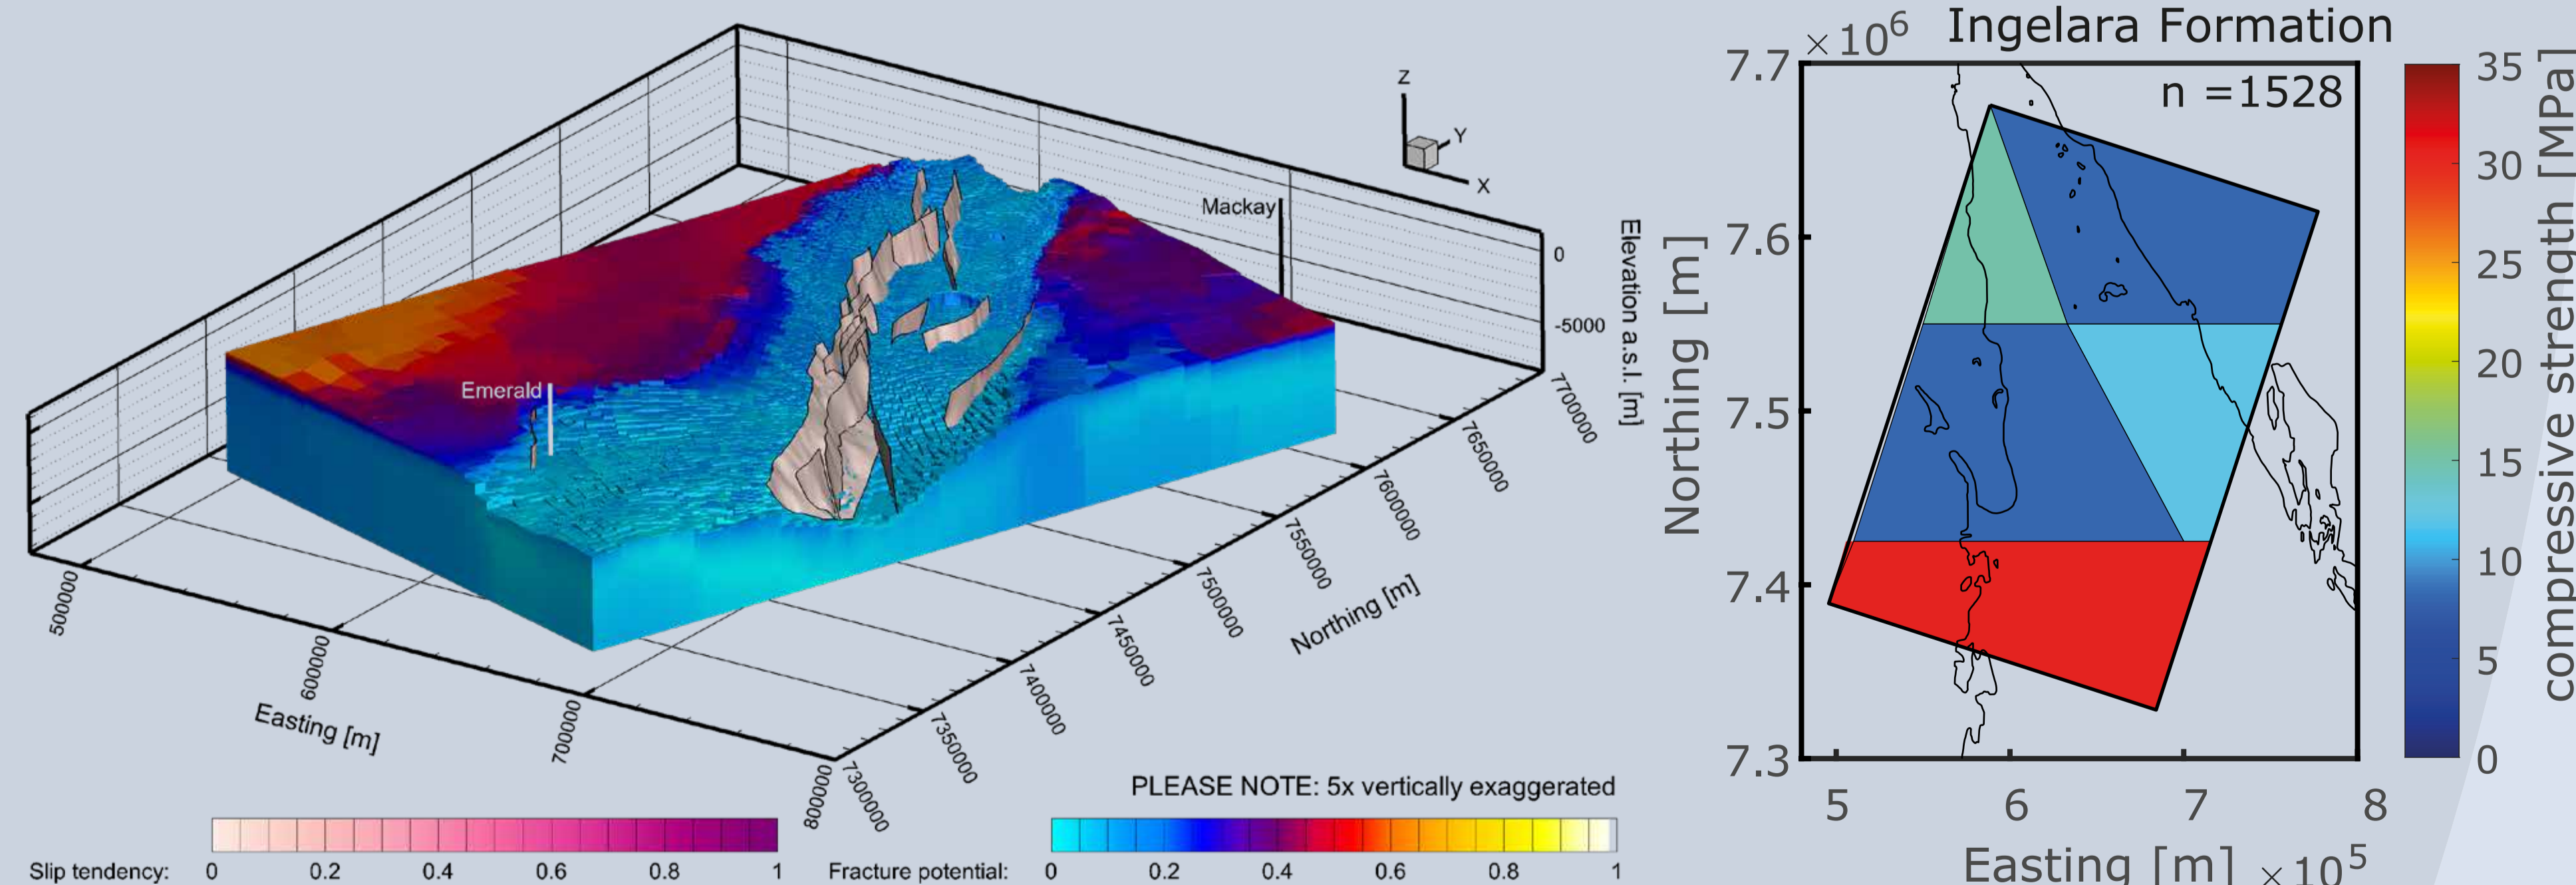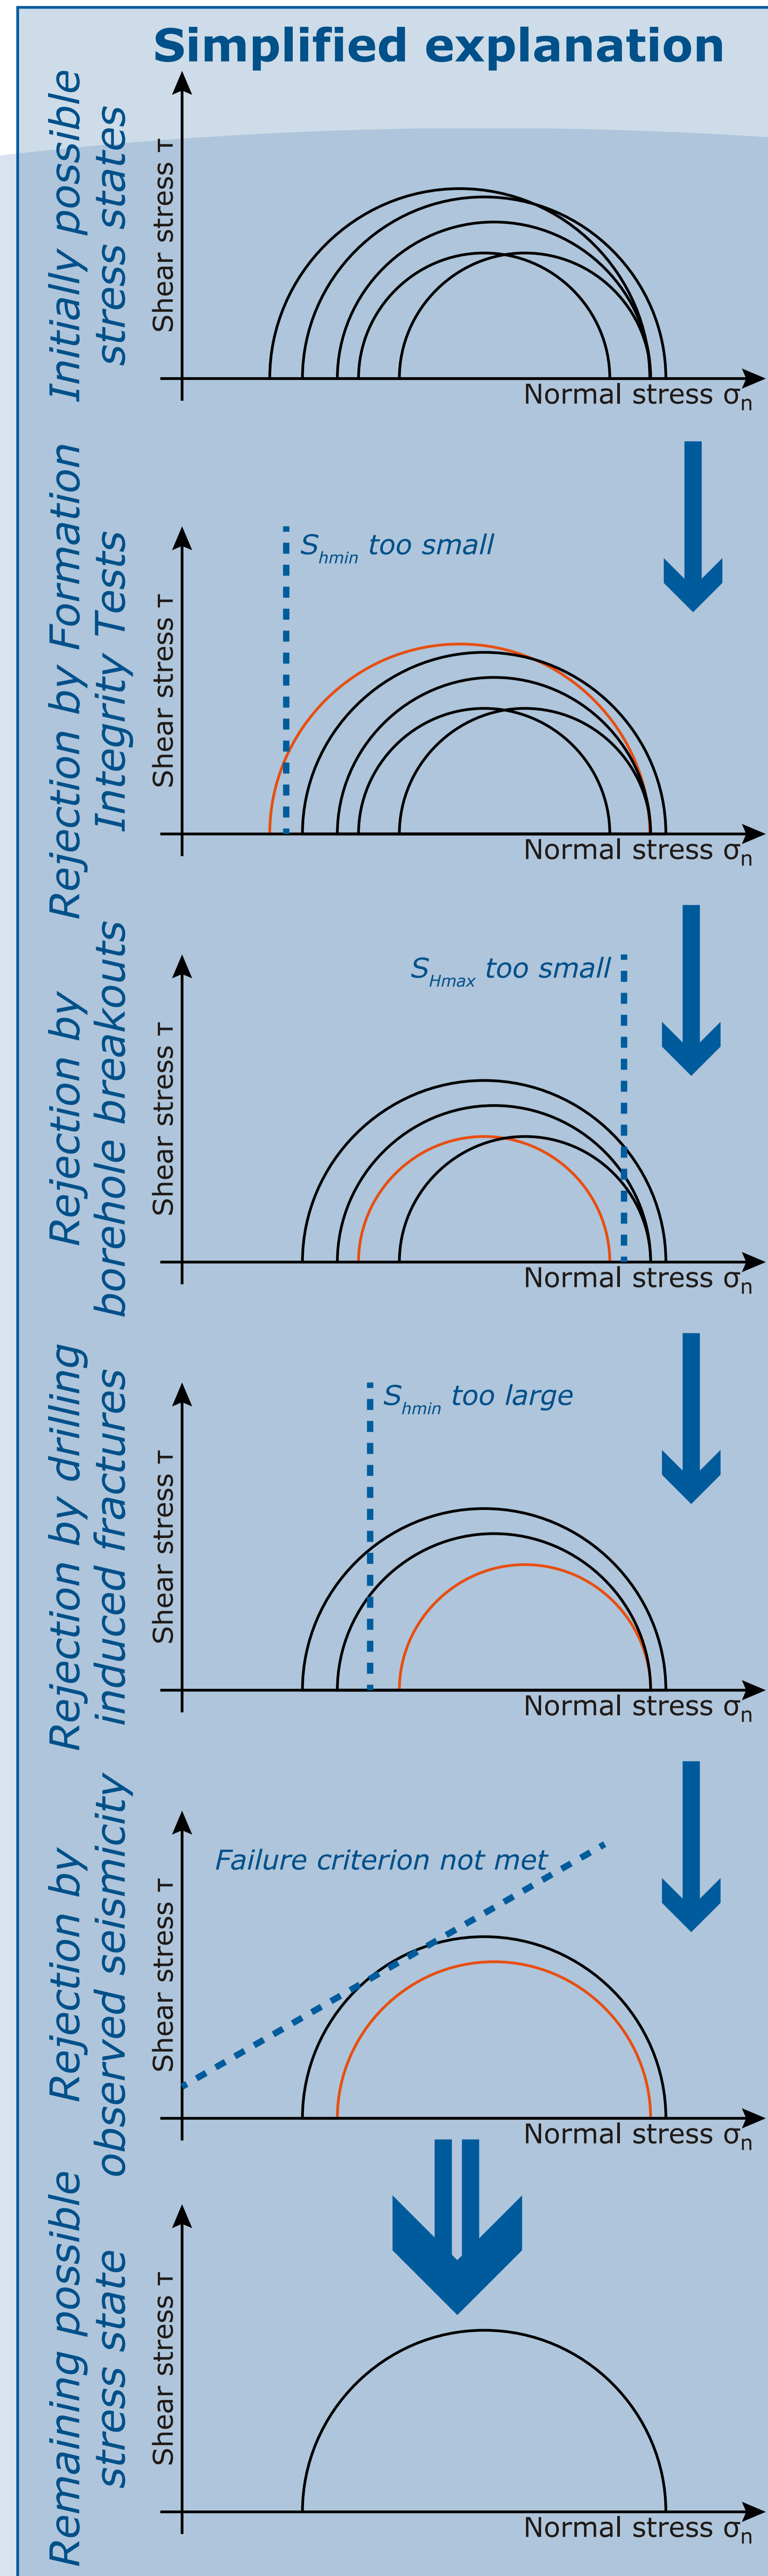

Further reading

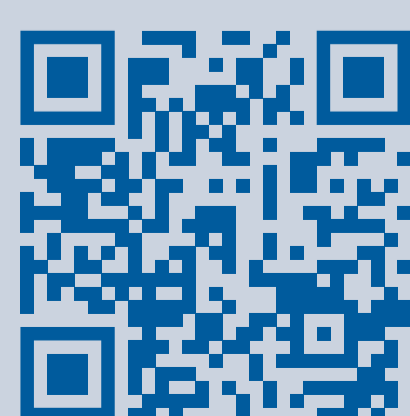

Ziegler, M. O., & Heidbach, O. (2023). Bayesian quantification and reduction of uncertainties in 3D geomechanical-numerical models. *Journal of Geophysical Research: Solid Earth*, 128, e2022JB024855. <https://doi.org/10.1029/2022JB024855>
